# Supplementary material for: Comparative Genomics Reveals Genetic Diversity and Variation in Metabolic Traits in Fructilactobacillus sanfranciscensis Strains
Source: MDPI journal article supplement (doi:10.3390/microorganisms12050845), 2024-04-23
Supplement: s1 [file s1]

**Table S1.** The carbohydrate-active enzymes genes related of exopolysaccharides (EPS) of 14 strains of *Fructilactobacillus sanfranciscensis*.

| Carbohydrate-active<br>enzymes family | GH68 (levansucrase; EC 2.4.1.10)                                                                              | GH70 (dextransucrase; EC<br>2.4.1.5)                             | GT5 ( $\alpha$ -1,3-glucan synthase;<br>EC 2.4.1.183)                                                         |
|---------------------------------------|---------------------------------------------------------------------------------------------------------------|------------------------------------------------------------------|---------------------------------------------------------------------------------------------------------------|
|                                       | Cleaves sucrose into fructose and<br>glucose and use the cleavage<br>energy to form levan out of<br>fructose. | Transfer a D-glucosyl residue<br>from sucrose to a glucan chain. | A glucan primer is needed to<br>begin the reaction, which brings<br>about elongation of the glucan<br>chains. |
| Strains                               |                                                                                                               |                                                                  |                                                                                                               |
| Fs_1001                               | +                                                                                                             | -                                                                | -                                                                                                             |
| Fs_1002                               | -                                                                                                             | -                                                                | -                                                                                                             |
| Fs_1003                               | +                                                                                                             | +                                                                | +                                                                                                             |
| Fs_1004                               | -                                                                                                             | +                                                                | -                                                                                                             |
| Fs_1005                               | -                                                                                                             | +                                                                | -                                                                                                             |
| Fs_1006                               | -                                                                                                             | -                                                                | -                                                                                                             |
| Fs_1007                               | +                                                                                                             | -                                                                | -                                                                                                             |
| Fs_1008                               | -                                                                                                             | +                                                                | -                                                                                                             |
| Fs_1009                               | +                                                                                                             | -                                                                | -                                                                                                             |
| Fs_1010                               | -                                                                                                             | +                                                                | -                                                                                                             |
| Fs_1011                               | -                                                                                                             | -                                                                | -                                                                                                             |
| Fs_1012                               | -                                                                                                             | -                                                                | -                                                                                                             |
| Fs_1013                               | -                                                                                                             | -                                                                | -                                                                                                             |
| Fs_1014                               | -                                                                                                             | -                                                                | -                                                                                                             |

–: No carbohydrate-active enzymes genes related of EPS.

+: Containing the carbohydrate-active enzymes genes related of EPS.

**Table S2.** CRISPR-Cas system in *Fructilactobacillus sanfranciscensis*.

| Strains             | DR sequence                              | DR length | CAS Type | CAS enzyme type        |
|---------------------|------------------------------------------|-----------|----------|------------------------|
| DSM20               |                                          |           |          |                        |
| 541/<br>TMW<br>1.53 | GTTTTAGAAGTACGTCATTCTAAT<br>GAGATTAAGAGC | 36        | IIA      | cas9, cas1, cas2, csn2 |
| TMW1.<br>54         | GTATTCCCCACGCATGTGGGGGTG<br>ATCCT        | 29        | IE       | cas3, cas5, cas6, cas7 |
| TMW<br>1.392        | GTTTTAGAAGTACGTCATTCTAAT<br>GAGATTAAGAG  | 35        | IIA      | cas9, cas1, cas2, csn2 |
| TMW<br>1.640        | GTTTTAGAAGTATGTCATTCTAATG<br>AGATTAAGAGC | 36        | IIA      | cas9, cas1, cas2, csn2 |
| TMW<br>1.726        | GTATTCCCCACGCATGTGGGGGTG<br>ATCC         | 28        | IE       | cas5, cas6, cas7       |
| TMW<br>1.897        | GTTTTAGAAGTACGTCATTCTAAT<br>GAGATTAAGAGC | 36        | IIA      | csn2                   |
| TMW<br>1.907        | GCTCTTAATCTCATTAGAATGACG<br>TACTTCTAAAAC | 36        | IIA      | cas2, cas1, cas9, csn2 |
| TMW<br>1.936        | GTTTTAGAAGTACGTCATTCTAAT<br>GAGATTAAGAGC | 36        | IIA      | cas2, cas1, cas9, csn2 |
| TMW<br>1.1150       | GCTCTTAATCTCATTAGAATGACG<br>TACTTCTAAAAC | 36        | IIA      | csn2, cas2, cas1, cas9 |
| TMW<br>1.1152       | GTTTTAGAAGTACGTCATTCTAAT<br>GAGATTAAGAGC | 36        | IIA      | cas9, cas1, cas2, csn2 |
| TMW<br>1.1154       | GCTCTTAATCTCATTAGAATGACG<br>TACTTCTAAAAC | 36        | IIA      | csn2, cas2, cas1, cas9 |
| TMW<br>1.1221       | GTTTTAGAAGTACGTCATTCTAAT<br>GAGATTAAGAGC | 36        | IIA      | cas2, cas1, csn2       |
| TMW<br>1.1304       | AGGATCACCCCCACATGCGTGGGG<br>AATAC        | 29        | IE       | cas5, cas6, cas7       |
| TMW<br>1.1470       | GTTTTAGAAGTACGTCATTCTAAT<br>GAGATTAAGAGC | 36        | IIA      | cas9, cas1, cas2, csn2 |
| TMW<br>1.1730       | GTATTCCCCACGCATGTGGGGGTG<br>ATCCT        | 29        | IE       | cas3, cas5, cas6, cas7 |
| TMW<br>1.2137       | GCTCTTAATCTCATTAGAATGACG<br>TACTTCTAAAAC | 36        | IIA      | csn2, cas2, cas1, cas9 |
| TMW<br>1.2138       | GCTCTTAATCTCATTAGAATGACG<br>TACTTCTAAAAC | 36        | IIA      | cas2, cas1, cas9, csn2 |

|               |                                          |    |     |                                       |
|---------------|------------------------------------------|----|-----|---------------------------------------|
| TMW<br>1.2139 | GTTTTAGAAGTACGTCATTCTAAT<br>GAGATTAAGAGC | 36 | IIA | cas2, cas1, cas9, csn2                |
| TMW<br>1.2140 | GTTTTAGAAGTACGTCATTCTAAT<br>GAGATTAAGAGC | 36 | IIA | cas2, cas1, cas9, csn2                |
| TMW<br>1.2142 | GCTCTTAATCTCATTAGAATGACG<br>TACTTCTAAAAC | 36 | IIA | csn2, cas2, cas1, cas9                |
| LS451         | GCTCTTAATCTCATTAGAATGACG<br>TACTTCTAAAAC | 36 | IIA | csn2, cas2, cas1, cas9                |
| JCM<br>5668   | GCTCTTAATCTCATTAGAATGACG<br>TACTTCTAAAAC | 36 | IIA | csn2, cas2, cas1, cas9                |
| Ls-1001       | GCTCTTAATCTCATTAGAATGACG<br>TACTTCTAAAAC | 36 | IIA | cas2, cas1, csn2                      |
| Ah4           | GCTCTTAATCTCATTAGAATGACG<br>TACTTCTAAAAC | 36 | IIA | cas2, cas1, cas9, csn2                |
| Gs2           | GCTCTTAATCTCATTAGAATGACG<br>TACTTCTAAAAC | 36 | IIA | csn2, cas2, cas1, cas9                |
| Gs9           | GTATTCCCCACGCATGTGGGGGTG<br>ATCC         | 28 | IE  | cas1, cas2, cas3, cas5, cas6,<br>cas7 |
| Ts9           | GCTCTTAATCTCATTAGAATGACG<br>TACTTCTAAAAC | 36 | IIA | csn2                                  |
| Sd1_3         | GTTTTAGAAGTACGTCATTCTAAT<br>GAGATTAAGAGC | 36 | IIA | cas2, cas1, cas9, csn2                |
| Fs_1001       | GTTTTAGAAGTACGTCATTCTAAT<br>GAGATTAAGAGC | 36 | IIA | cas9, cas1, cas2, csn2                |
| Fs_1002       | GTATTCCCCACGCATGTGGGGGTG<br>ATCC         | 29 | IE  | cas1, cas2, cas3, cas5, cas6,<br>cas7 |
| Fs_1003       | GCTCTTAATCTCATTAGAATGACG<br>TACTTCTAAAAC | 37 | IIA | csn2                                  |
| Fs_1004       | GTTTTAGAAGTACGTCATTCTAAT<br>GAGATTAAGAGC | 38 | IIA | cas2, cas1, cas9, csn2                |
| Fs_1005       | GTTTTAGAAGTACGTCATTCTAAT<br>GAGATTAAGAGC | 37 | IIA | cas2, cas1, cas9, csn2                |
| Fs_1006       | GTTTTAGAAGTACGTCATTCTAAT<br>GAGATTAAGAGC | 37 | IIA | cas9, cas1, cas2, csn2                |
| Fs_1007       | GTTTTAGAAGTACGTCATTCTAAT<br>GAGATTAAGAGC | 36 | IIA | cas2, cas1, cas9, csn2                |
| Fs_1008       | GTTTTAGAAGTACGTCATTCTAAT<br>GAGATTAAGAGC | 36 | IIA | cas9, cas1, cas2, csn2                |
| Fs_1009       | GTTTTAGAAGTACGTCATTCTAAT<br>GAGATTAAGAGC | 36 | IIA | cas2, cas1, cas9, csn2                |
| Fs_1009       | GTTTTAGAAGTACGTCATTCTAAT<br>GAGATTAAGAGC | 36 | IIA | cas9, cas1, cas2, csn2                |

|         |                                          |    |     |                        |
|---------|------------------------------------------|----|-----|------------------------|
| Fs_1010 | GTTTTAGAAGTACGTCATTCTAAT<br>GAGATTAAGAGC | 36 | IIA | csn2, cas3             |
| Fs_1011 | GTTTTAGAAGTACGTCATTCTAAT<br>GAGATTAAGAGC | 36 | IIA | cas2, cas1, cas9, csn2 |
| Fs_1012 | GTTTTAGAAGTACGTCATTCTAAT<br>GAGATTAAGAGC | 36 | IIA | cas2, cas1, cas9, csn2 |
| Fs_1013 | GTTTTAGAAGTACGTCATTCTAAT<br>GAGATTAAGAGC | 36 | IIA | cas2, cas1, cas9, csn2 |
| Fs_1014 | GTTTTAGAAGTACGTCATTCTAAT<br>GAGATTAAGAGC | 36 | IIA | cas2, cas1, cas9, csn2 |

---

**Table S3.** Prediction of intact prophage regions of *Fructilactobacillus sanfranciscensis*.

| Strain     | Region | Region Length | Completeness | Score | Total Proteins | Region Position               | Most Common Phage                  | GC %    |
|------------|--------|---------------|--------------|-------|----------------|-------------------------------|------------------------------------|---------|
| DSM20541   |        |               |              |       |                |                               |                                    |         |
| /          | -      | -             | -            | -     | -              | -                             | -                                  | -       |
| TMW 1.53   |        |               |              |       |                |                               |                                    |         |
| TMW1.54    | 1      | 8.5Kb         | incomplete   | 30    | 14             | 2220-10785<br>info_outline    | PHAGE_Bacill_G_NC_023719 (3)       | 40.01 % |
| TMW 1.392  | -      | -             | -            | -     | -              | -                             | -                                  | -       |
|            | 1      | 8.5Kb         | incomplete   | 10    | 9              | 134128-142642<br>info_outline | PHAGE_Prochl_P_SSM2_NC_006883 (4)  | 38.18 % |
| TMW 1.640  | 1      | 8.3Kb         | incomplete   | 40    | 10             | 25184-33578<br>info_outline   | PHAGE_Lactob_3_521_NC_048753 (1)   | 35.32 % |
| TMW 1.726  | -      | -             | -            | -     | -              | -                             | -                                  | -       |
| TMW 1.897  | -      | -             | -            | -     | -              | -                             | -                                  | -       |
| TMW 1.907  | 1      | 43.1Kb        | intact       | 130   | 55             | 69802-112961<br>info_outline  | PHAGE_Lactob_LfeSau_NC_029068 (11) | 36.64 % |
| TMW 1.936  | 1      | 8.1Kb         | incomplete   | 40    | 9              | 33562-41719<br>info_outline   | PHAGE_Brevib_Davies_NC_022980 (1)  | 35.85 % |
| TMW 1.1150 | -      | -             | -            | -     | -              | -                             | -                                  | -       |
| TMW 1.1152 | 1      | 8.4Kb         | incomplete   | 40    | 10             | 9498-17923<br>info_outline    | PHAGE_Brevib_Davies_NC_022980 (1)  | 35.30 % |
| TMW 1.1154 | 1      | 8.4Kb         | incomplete   | 40    | 10             | 68950-77375<br>info_outline   | PHAGE_Brevib_Jimmer2_NC_041976 (1) | 35.30 % |

|               |   |        |              |    |    |                             |                                           |            |
|---------------|---|--------|--------------|----|----|-----------------------------|-------------------------------------------|------------|
| TMW<br>1.1221 | 1 | 8.4Kb  | incomplete   | 40 | 10 | 9403-17821<br>info_outline  | PHAGE_Entero_phiEF24<br>C_NC_009904 (1)   | 35.31<br>% |
| TMW<br>1.1304 | 1 | 9Kb    | incomplete   | 40 | 10 | 60527-69621<br>info_outline | PHAGE_Lactob_3_521_NC_048753 (1)          | 35.23<br>% |
|               | 1 | 6.1Kb  | incomplete   | 10 | 9  | 82435-88554<br>info_outline | PHAGE_Bacill_vB_BtS_BMBtp14_NC_048640 (2) | 31.83<br>% |
| TMW<br>1.1470 | 1 | 7.7Kb  | incomplete   | 40 | 8  | 88429-96216<br>info_outline | PHAGE_Lactob_Lb338_1_NC_012530 (1)        | 35.41<br>% |
|               | 1 | 32.7Kb | questionable | 70 | 21 | 45696-78484<br>info_outline | PHAGE_Shigel_Sf6_NC_005344 (2)            | 37.40<br>% |
| TMW<br>1.1730 | 1 | 9Kb    | incomplete   | 40 | 10 | 25818-34912<br>info_outline | PHAGE_Yersin_fHe_Yen9_04_NC_042116 (1)    | 35.22<br>% |
| TMW<br>1.2137 | - | -      | -            | -  | -  | -                           | -                                         | -          |
| TMW<br>1.2138 | - | -      | -            | -  | -  | -                           | -                                         | -          |
|               | 1 | 8.4Kb  | incomplete   | 40 | 13 | 3949-12392<br>info_outline  | PHAGE_Bacill_G_NC_023719 (3)              | 43.02<br>% |
| TMW<br>1.2139 | 1 | 5.7Kb  | incomplete   | 40 | 7  | 36-5832<br>info_outline     | PHAGE_Brevib_Abouo_NC_029029 (1)          | 34.17<br>% |
| TMW<br>1.2140 | - | -      | -            | -  | -  | -                           | -                                         | -          |
| TMW<br>1.2141 | 1 | 5.7Kb  | incomplete   | 50 | 9  | 15541-21290<br>info_outline | PHAGE_Lactob_phiAT3_NC_005893 (2)         | 41.39<br>% |
| TMW<br>1.2142 | - | -      | -            | -  | -  | -                           | -                                         | -          |
| TMW           | 1 | 9Kb    | incompl      | 40 | 10 | 60527-69621                 | PHAGE_La                                  | 35.22      |

|               |   |        |                |     |    |                                     |                                                              |            |
|---------------|---|--------|----------------|-----|----|-------------------------------------|--------------------------------------------------------------|------------|
| 1.2134        |   |        | ete            |     |    | info_outline                        | ctob_Lb338<br>_1_NC_012<br>530 (1)<br>PHAGE_Te               | %          |
|               | 1 | 8.7Kb  | incompl<br>ete | 60  | 6  | 6003-14729<br>info_outline          | naci_PTm1_<br>NC_049340<br>(2)<br>PHAGE_Ba                   | 30.56<br>% |
|               | 1 | 10.8Kb | incompl<br>ete | 10  | 9  | 50303-61195<br>info_outline         | cill_G_NC_<br>023719 (2)<br>PHAGE_La                         | 31.98<br>% |
| TMW<br>1.1597 | 1 | 26.9Kb | intact         | 120 | 31 | 279-27210<br>info_outline           | ctob_LF1_N<br>C_019486<br>(8)<br>PHAGE_La                    | 44.01<br>% |
|               | 1 | 5.7Kb  | incompl<br>ete | 20  | 13 | 105-5890<br>info_outline            | ctob_Lv_1_<br>NC_011801<br>(3)<br>PHAGE_La                   | 35.00<br>% |
|               | 1 | 6.6Kb  | incompl<br>ete | 50  | 11 | 180297-1869<br>35<br>info_outline   | ctob_521B_<br>NC_048752<br>(2)<br>PHAGE_Ba                   | 35.94<br>% |
| LS451         | 2 | 8Kb    | incompl<br>ete | 40  | 8  | 242757-2508<br>47<br>info_outline   | cill_Shanette<br>_NC_02898<br>3 (1)<br>PHAGE_La              | 35.83<br>% |
|               | 3 | 4.9Kb  | incompl<br>ete | 40  | 8  | 1143165-114<br>8088<br>info_outline | ctob_Lb338<br>_1_NC_012<br>530 (1)<br>PHAGE_No               | 34.26<br>% |
| JCM 5668      | - | -      | -              | -   | -  | -                                   | -                                                            | -          |
| Ls-1001       | 1 | 8.8Kb  | incompl<br>ete | 30  | 10 | 12550-21414<br>info_outline         | dula_vB_Ns<br>pS_kac65v1<br>51_NC_048<br>756 (2)<br>PHAGE_Bu | 36.25<br>% |
| Ah4           | 1 | 8.4Kb  | incompl<br>ete | 40  | 10 | 38578-46999<br>info_outline         | rkho_BcepS<br>auron_NC_0<br>49851 (1)<br>PHAGE_No            | 35.31<br>% |
|               | 1 | 8.8Kb  | incompl<br>ete | 40  | 11 | 34145-42963<br>info_outline         | dula_vB_Ns<br>pS_kac65v1                                     | 36.67<br>% |

|         |   |        |            |    |    |                               |                                                       |        |
|---------|---|--------|------------|----|----|-------------------------------|-------------------------------------------------------|--------|
| Gs2     | 1 | 8.4Kb  | incomplete | 40 | 10 | 25806-34228<br>info_outline   | 51_NC_048756 (2)<br>PHAGE_Achrom_Motura_NC_049849 (1) | 35.33% |
| Gs9     | 1 | 8.8Kb  | incomplete | 30 | 10 | 30074-38912<br>info_outline   | PHAGE_Nodula_vB_NspS_kac68v161_NC_048757 (2)          | 36.35% |
| Ts9     | 1 | 8.4Kb  | incomplete | 40 | 10 | 19322-27743<br>info_outline   | PHAGE_Enterophi92_NC_023693 (1)                       | 35.34% |
| Sd1_3   | 1 | 8.4Kb  | incomplete | 40 | 10 | 26439-34862<br>info_outline   | PHAGE_Brevib_Abouo_NC_029029 (1)                      | 35.34% |
| Fs_1001 | 1 | 15.7Kb | incomplete | 40 | 10 | 115688-131483<br>info_outline | PHAGE_Bacill_Shanette_NC_028983 (1)                   | 0.3509 |
| Fs_1002 | 1 | 8.4Kb  | incomplete | 40 | 10 | 9432-17854<br>info_outline    | PHAGE_Brevib_Jimmer1_NC_029104 (1)                    | 0.3526 |
| Fs_1003 | 1 | 8.4Kb  | incomplete | 40 | 10 | 38659-47080<br>info_outline   | PHAGE_Brevib_Jimmer2_NC_041976 (1)                    | 0.3538 |
| Fs_1004 | 1 | 8.4Kb  | incomplete | 40 | 10 | 9933-18354<br>info_outline    | PHAGE_Brevib_Jimmer2_NC_041976 (1)                    | 0.3535 |
| Fs_1005 | 1 | 15.7Kb | incomplete | 40 | 10 | 115683-131478<br>info_outline | PHAGE_Brevib_Osiris_NC_028969 (1)                     | 0.3509 |
| Fs_1006 | 1 | 8.5Kb  | incomplete | 40 | 10 | 37588-46110<br>info_outline   | PHAGE_Burkho_BcepSaruman_NC_049850 (1)                | 0.3523 |



|         |   |        |            |    |    |                               |                                       |        |
|---------|---|--------|------------|----|----|-------------------------------|---------------------------------------|--------|
| Fs_1007 | 1 | 8.3Kb  | incomplete | 40 | 11 | 37360-45752<br>info_outline   | PHAGE_Entero_EFLK1_NC_029026 (1)      | 0.354  |
| Fs_1008 | 1 | 8.4Kb  | incomplete | 40 | 10 | 9933-18354<br>info_outline    | PHAGE_Entero_EFLK1_NC_029026 (1)      | 0.3535 |
| Fs_1009 | 1 | 8.4Kb  | incomplete | 40 | 10 | 9432-17854<br>info_outline    | PHAGE_Entero_EfV12_phi1_NC_048087 (1) | 0.3527 |
| Fs_1010 | 1 | 8.4Kb  | incomplete | 40 | 10 | 29104-37564<br>info_outline   | PHAGE_Entero_phi92_NC_023693 (1)      | 0.3537 |
| Fs_1011 | 1 | 8.4Kb  | incomplete | 40 | 10 | 38659-47080<br>info_outline   | PHAGE_Staphy_vB_SscM_1_NC_047767 (1)  | 0.3538 |
| Fs_1012 | 1 | 15.7Kb | incomplete | 40 | 10 | 115683-131478<br>info_outline | PHAGE_Strept_BRock_NC_048650 (1)      | 0.3509 |
| Fs_1013 | 1 | 8.4Kb  | incomplete | 40 | 10 | 119712-128135<br>info_outline | PHAGE_Halovi_HGTV_1_NC_021328 (1)     | 0.3534 |
| Fs_1014 | 1 | 8.4Kb  | incomplete | 40 | 10 | 119716-128139<br>info_outline | PHAGE_Brevib_Abouo_NC_029029 (1)      | 0.3534 |

---
